# Supplementary material
Source: ML conference proceedings conference paper supplement (https://openreview.net/forum?id=lBhRTO2uWf)
Supplement: supplementary_material [file attachment]

## A Datasets

### A.1 Real Datasets

In this work, we use a total of 9 continuous and 3 categorical datasets, with their dimensions and data types shown in Table 2. The Gas, Covid, and Energy datasets are the same as those used in [9], and we apply identical preprocessing procedures. The Musk2 dataset provides information on musk and non-musk molecules. The Scene dataset describes image characteristics. The MNIST dataset consists of images depicting handwritten digits. The Dilbert dataset is an image recognition dataset of pictures of objects rotated from various orientations. We additionally include 3 internal datasets of biomedical data: Phenotypes, Canine, and Founders datasets. The Phenotypes dataset contains a subset of categorical phenotypes from the UK Biobank (UKB), following the same pre-processing as in [71]. We use the UKB under the application number (*XXXXX-hidden-for-submission*). The Canine and Founders datasets comprise binary-coded sequences of DNA including Single Nucleotide Polymorphisms (SNPs), representing data for multiple dog breeds and human populations, respectively.

The Polynomial and Cosine are two internally generated datasets consisting of values obtained from deterministic simulations. The Polynomial dataset includes samples where each feature value is obtained by evaluating a second-degree polynomial function  $f(x) = ax^2 + bx + c$ . The parameters  $a$ ,  $b$ , and  $c$  are fixed for each sample. The feature values are derived by evaluating the polynomial function for the different  $x$  values within a sample. The values for  $x$ ,  $a$ ,  $b$ , and  $c$  are uniformly sampled from the range of  $[-10, 10]$ . The Cosine dataset consists of samples with features following a cosine function  $f(x) = a \cdot \cos(bx + c)$ . Similar to the Polynomial dataset,  $a$ ,  $b$ , and  $c$  are fixed for each sample, and each feature value is obtained by evaluating the cosine function for the different  $x$  values within a sample. Here, the values of  $b$  and  $c$  are uniformly sampled within the range of  $[-\pi, \pi]$ .

Table 2: Datasets used to evaluate DataFix.

| Dataset    | No. of attributes | No. of samples | Data Type   |
|------------|-------------------|----------------|-------------|
| Gas        | 8                 | 12,815         | Continuous  |
| Covid      | 10                | 9,889          | Continuous  |
| Energy     | 26                | 19,735         | Continuous  |
| Musk2      | 166               | 6,598          | Continuous  |
| Scene      | 294               | 2,407          | Continuous  |
| MNIST      | 784               | 70,000         | Continuous  |
| Phenotypes | 1,227             | 31,424         | Categorical |
| Dilbert    | 2,000             | 10,000         | Continuous  |
| Founders   | 10,000            | 4,144          | Categorical |
| Canine     | 198,473           | 1,444          | Categorical |
| Cosine     | 1,000             | 10,000         | Continuous  |
| Polynomial | 1,000             | 10,000         | Continuous  |

### A.2 Simulated Probabilistic Datasets

We generate 15 simulated datasets containing 1000 features and 5000 samples by sampling from pre-defined probabilistic distributions, including multivariate Gaussians, with and without transformations, multivariate Bernoulli distributions, Gaussian mixture models, and Bernoulli mixture models. A total of 200 features are shifted in each dataset such that  $|C| = 200$  and  $|\bar{C}| = 800$ . Table 3 describes the distributions used in each dataset. For every dataset, two distributions,  $p$  and  $q$ , are defined, so that  $D(p, q) > 0$  but  $D(p_{\bar{C}}, q_{\bar{C}}) = 0$ . In fact, for all datasets except for dataset 8, we also have that  $D(p_C, q_C) > 0$ . A further discussion of the effect of shifts with  $D(p_C, q_C) > 0$  and with  $D(p_C, q_C) = 0$ , and its relation to the equivalence of feature shift localization and feature selection, is provided in the following sections. Because we have access to  $p$  and  $q$ , we can compute the real divergence between the distributions. In practice, we make use of a Monte Carlo estimate, as shown in figures 5, 18 and 19, because the divergences might not have a closed-form solution or can be computationally intractable.

577 Datasets 1-3 are based on a multivariate Gaussian, with diagonal covariance used in datasets 1 and 2,  
578 and a covariance  $\Sigma$  used in dataset 3. The covariance matrix  $\Sigma$  is defined by a Gaussian kernel such  
579 that the  $ij$  component is  $\Sigma_{ij} = \exp \frac{-||i-j||^2}{s}$ , where  $s$  acts as a scale parameter, and  $0 \leq \Sigma_{ij} \leq 1$   
580 with  $\Sigma_{ii} = 1$ . In practice, when constructing the covariance matrix, we perform a shuffle of the  
581 feature order to better depict tabular data, where, in many cases, the correlation between features  
582 does not follow any specific ordering (opposed to images or audio). We use  $s = 0.05$  to define  
583  $\Sigma_{ij}$  in dataset 3. Datasets 4 and 5 follow a lognormal distribution, defined as  $X = \exp(V)$  with  
584  $V \sim \mathcal{N}(\mu, \Sigma)$  and  $X \sim \text{Lognormal}(\mu, \Sigma)$ . We use  $s = 0.05$  and  $s = 0.002$  to define  $\Sigma_{ij}$  in datasets  
585 4 and 5, respectively. Datasets 6-8 follow a logit-normal distribution defined as  $X = \sigma(V)$  with  
586  $V \sim \mathcal{N}(\mu, \Sigma)$  and  $X \sim P(\mathcal{N}(\mu, \Sigma))$ , where  $\sigma$  is the sigmoid transformation. We use  $s = 0.05$ ,  
587  $s = 0.002$ , and  $s = 0.002$  to define  $\Sigma_{ij}$  in datasets 6, 7, and 8, respectively. Datasets 9-12 follow  
588 a multivariate Bernoulli with independent features. Each feature  $i$  has a frequency of  $f_i$ , where  
589  $f \sim P(\mathcal{N}(0, 2I))$ ,  $\epsilon \sim \mathcal{N}(0, I)$ , and  $(\cdot)_{0,1} = \text{clamp}_{0,1}(\cdot) = \min(\max(\cdot, 0), 1)$  is the clamping  
590 function to ensure that the frequencies are between 0 and 1. Dataset 13 follows a Gaussian Mixture  
591 Model distribution, with 3 mixtures of equal weights,  $\mu_i \sim \mathcal{N}(0, 0.01I)$ , and  $\Sigma_i$  defined with  
592  $s = 0.3$ . Datasets 14 and 15 follow a Bernoulli Mixture Model distribution with 3 mixtures and  
593  $f_i \sim \text{Uniform}^d(0, 1)$ .

594 Datasets 1, 3, 4, 6, 9, 10, 11, 12, 13, and 15 apply a shift to the marginal means, such that for all  
595  $i \in C$ ,  $\mathbb{E}[p_{C_i}] \neq \mathbb{E}[q_{C_i}]$ . Such datasets include marginal shifts of a similar nature as the shifts  
596 generated by manipulation types 1, 2, and 6 applied to real datasets. Dataset 2 performs a shift of the  
597 marginal standard deviation while maintaining their mean such that for all  $i \in C$ ,  $\mathbb{E}[p_{C_i}] = \mathbb{E}[q_{C_i}]$   
598 but  $p_{C_i} \neq q_{C_i}$  and  $\text{Var}[p_{C_i}] \neq \text{Var}[q_{C_i}]$ , leading to a marginal shift similar to the one applied by  
599 manipulation type 4 used in the real datasets. Datasets 13 and 15 apply a shift to the mean of just one  
600 mixture of the mixture model, leading to only  $1/3$  of the samples being shifted, while still ensuring  
601 that  $\mathbb{E}[p_{C_i}] \neq \mathbb{E}[q_{C_i}]$ . Datasets 5, 7, and 14 apply a distribution shift consisting of removing the  
602 correlation between features, equivalently to manipulation type 3 applied in real datasets, such that  
603  $q_C = \prod_{i \in C} q_i$  and  $p_C \neq q_C$ . Dataset 8 also applies a shift originating from modifying the correlation  
604 between features, but in this case,  $\Sigma'$  is defined as:

$$\Sigma'_{ij} = \begin{cases} \Sigma_{ij} & \text{if } i, j \in C, \text{ or } i, j \in \overline{C} \\ 0 & \text{if } i \in C \text{ with } j \in \overline{C}, \text{ or } j \in C \text{ with } i \in \overline{C} \end{cases} \quad (10)$$

605 where the correlation of the features within  $C$  and within  $\overline{C}$  are maintained, but the cross-correlations  
606 between the  $C$  and  $\overline{C}$  are lost, which leads to a shift equivalent to manipulation type 8 applied in real  
607 datasets, such that  $p_C = q_C$ ,  $p_{\overline{C}} = q_{\overline{C}}$ , but  $p \neq q$ .

## 608 B Feature Selection and Feature Shift Localization Equivalence

609 Section 4 provides a description of when the problem of feature selection and of feature shift  
610 localization are equivalent. Namely, when the number of manipulated features is known  $|C| = k$ , and  
611 the divergence of the corrupted features is larger than 0, such that  $D_{TV}(p, q) = D_{TV}(p_C, q_C) = 1$ ,  
612 and  $D_{TV}(p_{\overline{C}}, q_{\overline{C}}) = 0$ , then both problems are equivalent:

$$C = \underset{|C| \leq k}{\operatorname{argmax}} I(z_C; t) = \underset{D_{TV}(p_{\overline{C}}, q_{\overline{C}}) = 0}{\operatorname{argmin}} |C| \quad (11)$$

613 Even if  $|C|$  is unknown, if only marginal shifts are present, one can perform feature shift detection by  
614 iteratively solving Eq.3 with  $k = 1$ , and removing the detected features at each iteration from  $z$  as  
615 long as  $I(z_C; t) > 0$ , making the iterative feature selection and feature shift localization equivalent  
616 problems:

$$C_i = \underset{|C|=1}{\operatorname{argmax}} I(z_C; t) \quad (12)$$

Table 3: Probabilistic datasets used to evaluate DataFix.

| ID | $p_C$                                                   | $q_C$                                                    | Description                                                                                                                 |
|----|---------------------------------------------------------|----------------------------------------------------------|-----------------------------------------------------------------------------------------------------------------------------|
| 1  | $\mathcal{N}(0, I)$                                     | $\mathcal{N}(0.5I, I)$                                   | Multivariate Gaussians with diagonal covariance and a shifted mean.                                                         |
| 2  | $\mathcal{N}(0, I)$                                     | $\mathcal{N}(0, 1.5I)$                                   | Multivariate Gaussians with diagonal covariance and a shifted scale.                                                        |
| 3  | $\mathcal{N}(0, \Sigma)$                                | $\mathcal{N}(0.5I, \Sigma)$                              | Multivariate Gaussians with non-diagonal covariance and a shifted mean.                                                     |
| 4  | Lognormal(0, $\Sigma$ )                                 | Lognormal(0.5I, $\Sigma$ )                               | Multivariate lognormal with non-diagonal covariance and a shifted mean.                                                     |
| 5  | Lognormal(0, $\Sigma$ )                                 | Lognormal(0, $I$ )                                       | Multivariate lognormal with non-diagonal ( $p_C$ ) and diagonal ( $q_C$ ) covariance.                                       |
| 6  | $P(\mathcal{N}(0, \Sigma))$                             | $P(\mathcal{N}(0.5I, \Sigma))$                           | Multivariate logit-normal with non-diagonal covariance and a shifted mean.                                                  |
| 7  | $P(\mathcal{N}(0, \Sigma))$                             | $P(\mathcal{N}(0, I))$                                   | Multivariate logit-normal with non-diagonal ( $p_C$ ) and diagonal ( $q_C$ ) covariance.                                    |
| 8  | $P(\mathcal{N}(0, \Sigma))$                             | $P(\mathcal{N}(0, \Sigma'))$                             | Multivariate logit-normal with different non-diagonal covariances.                                                          |
| 9  | Bernoulli( $f$ )                                        | Bernoulli( $((f + 0.05\epsilon)_{0,1})$ )                | Multivariate independent Bernoulli with a shifted mean.                                                                     |
| 10 | Bernoulli( $f$ )                                        | Bernoulli( $((f + 0.1\epsilon)_{0,1})$ )                 | Multivariate independent Bernoulli with a shifted mean.                                                                     |
| 11 | Bernoulli( $f$ )                                        | Bernoulli( $((f + 0.5\epsilon)_{0,1})$ )                 | Multivariate independent Bernoulli with a shifted mean.                                                                     |
| 12 | Bernoulli( $f$ )                                        | Bernoulli( $((f + 1.0\epsilon)_{0,1})$ )                 | Multivariate independent Bernoulli with a shifted mean.                                                                     |
| 13 | $\frac{1}{3} \sum_{i=1}^3 \mathcal{N}(\mu_i, \Sigma_i)$ | $\frac{1}{3} \sum_{i=1}^3 \mathcal{N}(\mu'_i, \Sigma_i)$ | Gaussian Mixture Model with one mixture shifted such that $\mu'_1 = \mu_1 + 10$ , $\mu'_2 = \mu_2$ , and $\mu'_3 = \mu_3$ . |
| 14 | BMM( $[f_1, f_2, f_3]$ )                                | BMM( $[f', f', f']$ )                                    | Bernoulli Mixture Model with different means $f' = \frac{f_1 + f_2 + f_3}{3}$ .                                             |
| 15 | BMM( $[f_1, f_2, f_3]$ )                                | BMM( $[(f_1 + 0.2)_{0,1}, f_2, f_3]$ )                   | Bernoulli Mixture Model with one mixture shifted.                                                                           |

617 where  $C = \bigcup_{i=1}^l C_i$ . In fact, the approach presented in section 4, DF-Locate, can be seen as an  
618 approximation of this iterative process, where one or more features are selected at each step by the  
619 feature removal policy function.

620 However, the equivalence of both tasks breaks down for distribution shifts such as the one applied  
621 in the manipulation type 8 for real datasets, and in dataset 8 of probabilistic simulations, where  
622  $p_C = q_C$  and  $p_{\bar{C}} = q_{\bar{C}}$ , but  $p \neq q$ . That is, when considering only the corrupted features  $C$  or  
623 the non-corrupted features  $\bar{C}$  in isolation, the shift is impossible to detect unless all features are  
624 considered jointly. Therefore, any feature selection technique that approximates either implicitly  
625 or explicitly equation 3, will need a subset of features  $G$  containing features from both  $C$  and  $\bar{C}$  in  
626 order to obtain  $I(z_G; t) > 0$ , because  $I(z_C; t) = 0$  and  $I(z_{\bar{C}}; t) = 0$ . Furthermore, if  $|C| = |\bar{C}|$  the  
627 problem of feature shift detection becomes unsolvable. This is because, even if a technique was able  
628 to properly identify a subset of features  $G = C$ , it would not be possible to know if the detected  
629 subset  $G$  contains corrupted or non-corrupted features, that is if  $G = C$  or  $G = \bar{C}$ , making the  
630 assumption of  $|C| < |\bar{C}|$  a necessary condition.

631 Figure 3 (right) and Figure 12 show the F-1 score for each manipulation type, indicating that DataFix  
632 is able to correctly localize manipulated features with manipulation type 8 on real datasets, despite  
633 breaking the equivalence between feature selection and feature shift localization approaches. In  
634 contrast, Figure 13, which illustrates the average F-1 on the probabilistic datasets, shows that dataset  
635 8 is the one providing the lowest F-1 scores. While the low F-1 score in dataset 8 can be partly  
636 caused by the mismatch between feature selection and feature shift localization problems, it can also

originate from the difficulty of detecting shifts caused by mismatching correlations, as it provides similar performance as in datasets 5 and 7, where correlation shifts (with  $p_C \neq q_C$ ) are applied.

## C Feature Shift from Imputation Methods

Imputation and supervised methods trained to reduce the expected mean square error (MSE) between the predicted  $\hat{x}_C$  and real  $x_C$  features of a given sample  $x$  can lead to distribution shifts. Note that the optimal function minimizing  $\mathbb{E}_{x \sim P}[||x_C - f(x_{\bar{C}})||^2]$  is the expected value of  $x_C$  conditioned in  $x_{\bar{C}}$ , that is  $f^*(x_{\bar{C}}) = \mathbb{E}[x_C|x_{\bar{C}}]$ . Therefore, the method that predicts the corrupted (or missing) features  $C$  given the non-corrupted (non-missing) features  $\bar{C}$ , which provides the lowest MSE, will generate predicted samples  $\hat{x}_C = f^*(x_{\bar{C}})$ , with a distribution where  $\mathbb{P}(\hat{x}_C) = 1$  for  $\hat{x}_C = \mathbb{E}[x_C|x_{\bar{C}}]$ , and  $\mathbb{P}(\hat{x}_C) = 0$  everywhere else. If  $\text{Var}[x_C|x_{\bar{C}}] > 0$ , then  $D(\mathbb{P}(\hat{x}_C), \mathbb{P}(x_C)) > 0$ , because  $\text{Var}[\hat{x}_C|x_{\bar{C}}] = 0$ .

For example, given a dataset of samples  $x_1, x_2, \dots, x_N$ , with  $x_{i\bar{C}} = x_{j\bar{C}}$  and  $x_{iC} \neq x_{jC}$  for all  $i$  and  $j$  – in other words,  $\text{Var}[x_C|x_{\bar{C}}] > 0$  –, the optimal regression model, in terms of MSE, will predict  $\hat{x}_{iC} = \mathbb{E}[x_{iC}|x_{i\bar{C}}]$  for all  $i$ , such that  $\text{Var}[\hat{x}_C|x_{\bar{C}}] = 0$ . Similarly, consider a dataset where the features  $C$  and  $\bar{C}$  are independent such that  $p = p_C p_{\bar{C}}$ , and  $p_C = \mathcal{N}(\mu, I)$ , then  $\hat{x}_C = \mathbb{E}[x_C|x_{\bar{C}}] = \mathbb{E}[x_C] = \mu$ , where  $\mu \in \mathbb{R}^{|C|}$  is a constant vector. The simulated probabilistic dataset 1 follows this form, with  $p_C = \mathcal{N}(0, I)$  and  $q_C = \mathcal{N}(0.5I, I)$ , where the method providing the lowest MSE will be the one predicting  $\hat{x}_C = \mathbb{E}[x_C|x_{\bar{C}}] = \mu = 0$  for all samples. Figure 6 shows the histogram of the first feature values before and after performing feature correction with multiple techniques. Most techniques, especially imputation-based techniques, output the mean or values highly close to it, which while producing minimum MSE, does not reflect the real distribution, removing or reducing its variance and leading to a distribution shift.

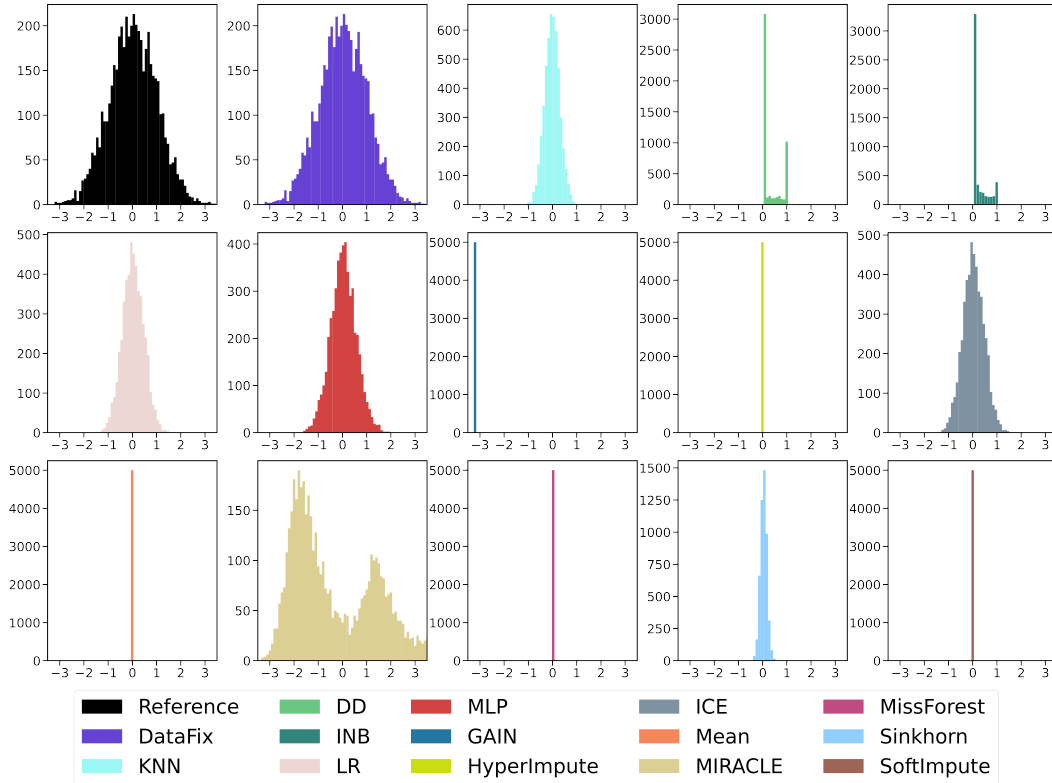

Figure 6: Distribution of first feature values before and after shift correction with various techniques for probabilistic dataset 1.



**Algorithm 1** DF-Locate: Feature Shift Localization

---

```

1: Inputs:
    $X$ ; ▷ Reference
    $Y$ ; ▷ Query
    $\tau$ ; ▷ Feature Selection Threshold
    $\epsilon$ ; ▷ Divergence Threshold
2:  $X^{(0)} = X$ 
3:  $Y^{(0)} = Y$ 
4:  $i = 0$ 
5:  $k^{(0)} = 0$ 
6: while  $\hat{D}_\theta(X^{(i)}, Y^{(i)}) > \epsilon$  and  $k < \frac{|Y|}{2}$  and  $k^{(i)} - k^{(i-1)} > 0$  do
7:    $\theta \leftarrow \text{Train}(X^{(i)}, Y^{(i)})$  ▷ Train discriminator
8:    $\hat{D} \leftarrow \hat{D}_\theta(X^{(i)}, Y^{(i)})$  ▷ Estimate divergence
9:    $\beta \leftarrow F_\theta(X^{(i)}, Y^{(i)})$  ▷ Estimate feature importance
10:   $C_i \leftarrow \psi_\tau(\beta, \hat{D})$  ▷ Select corrupted features
11:   $X^{(i+1)}, Y^{(i+1)} \leftarrow X_{\overline{C_i}}^{(i)}, Y_{\overline{C_i}}^{(i)}$  ▷ Remove detected features
12:   $k^{(i+1)} \leftarrow k^{(i)} + |C_i|$  ▷ Update detected feature counter
13:   $i \leftarrow i + 1$ 
14: end while
15:  $C = \bigcup_{j=0}^{i-1} C_j$  ▷ Combine all detected features
16:  $C \leftarrow \text{Refine}(C)$  ▷ Use knee-locator to refine detected features
17: return  $C$ 

```

---

DF-Locate (Section 4, Figure 1, and Algorithm 1) is the proposed method within DataFix that localizes the features originating the distribution shift by performing feature selection in an iterative way. First, starting with  $i = 0$ , and a reference  $X^{(0)} = X$  and query  $Y^{(0)} = Y$  datasets, a set of discriminators are trained  $\theta = \arg\max_\theta \hat{D}_\theta(X^{(i)}, Y^{(i)})$ . The discriminators are used to predict the empirical total variation divergence (TVD) between distributions  $\hat{D} = \hat{D}_\theta(X^{(i)}, Y^{(i)})$ , and a feature importance score for each feature  $\beta = F_\theta(X^{(i)}, Y^{(i)})$ . The divergence and feature importances are used to select potentially corrupted features with the feature removal policy function (see section 4)  $C_i = \psi_\tau(\beta, \hat{D})$ . Then, the detected features are removed from  $X$  and  $Y$ , such that  $X^{(i+1)} = X_{\overline{C_i}}^{(i)}$  and  $Y^{(i+1)} = Y_{\overline{C_i}}^{(i)}$ . The process is repeated as long as the estimated divergence is smaller than a threshold  $\hat{D}_\theta(X^{(i)}, Y^{(i)}) > \epsilon$ , less than half of the features of the dataset are removed  $k < \frac{|Y|}{2}$ , or at least one feature is selected by the feature removal policy function at each step  $k^{(i)} - k^{(i-1)} > 0$ . In this work we use  $\epsilon = 0.02$  as the stopping threshold. After the iterative process is stopped, a refinement step, described below, is applied to remove features that might have been incorrectly selected as corrupted.

In order to perform the refinement step, we store intermediate steps so that we can revisit and select the optimal stopping point throughout the iterative process. At each iteration, we store the indexes of the features selected as corrupted, the corresponding estimated TVD, and the number of removed features. While the ideal stopping iteration would be determined by the iteration providing the best localization performance, in terms of, for example, F-1 score, this requires access to the ground truth, which is unavailable in practice. However, there often exists a point at which the cost of removing additional features (i.e., selecting non-corrupted features as corrupted) outweighs the corresponding decrease in TVD. Once such optimal iteration is determined, all identified corrupted features up to that iteration are flagged as corrupted and later changed by DF-Correct.

To determine the optimal iteration from the curve depicting the TVD as a function of the total number of removed features, we locate the elbow or knee from a processed version of the curve (Figure 7). A curve obtained from a perfect discriminator would always exhibit a convex and decreasing shape. However, due to the intrinsic randomness in the training and evaluation process of the discriminator,

687 this ideal shape is not always achieved, making the task of locating the knee challenging. Several  
688 techniques can be applied to smooth the curve and transform it into a convex and decreasing function.  
689 In our approach, we make use of the Savitzky-Golay filter [72] due to its ability to effectively remove  
690 signal noise without distorting the underlying trend of the curve. Additionally, we apply an opening  
691 operation to eliminate any local maxima in the curve, ensuring that each point is equal to or smaller  
692 than its left neighbor. Furthermore, we process the initial iterations of the curve to enforce strict  
693 decreasing behavior.

694 The Savitzky-Golay filter relies on two key parameters: the length of the filter window and the  
695 polyorder used for fitting the samples. For the window length, we define it as  $\max(5, 2\lfloor \zeta\delta/2 \rfloor + 1)$ ,  
696 where  $\zeta$  is chosen from the set  $\{1, 2, 3, 5, 7\}$ , and  $\delta$  represents the average number of removed features  
697 at each iteration. We also experiment with different polyorders, considering values from the set  
698  $\{3, 4\}$ . Based on our experimentation on the simulated datasets, we determine that the optimal choice  
699 for  $\zeta$  is 2, and the best polyorder is 4. To identify the knee point, we employ the knee locator method  
700 introduced by [73]. The knee locator involves two primary parameters: the sensitivity ( $S$ ) and the  
701 online parameter. The sensitivity parameter determines the number of "flat" points we anticipate  
702 encountering in the unmodified data curve before identifying a knee, while the online parameter  
703 enables the correction of previous knee values when set to *True*. We explore different values for  
704  $S$  from the set  $\{1, 3, 5, 7\}$ , and for the *online* parameter from the options  $\{True, False\}$ . Our  
705 experimentation reveals that the optimal values for  $S$  and *online* are 5 and *False*, respectively.

706 Figure 7 shows an example of the knee location, used to refine the selection of features. The F-1 score  
707 can serve as a way to evaluate the selected stopping point, showing the trade-off between reduced  
708 TVD and the number of removed features.

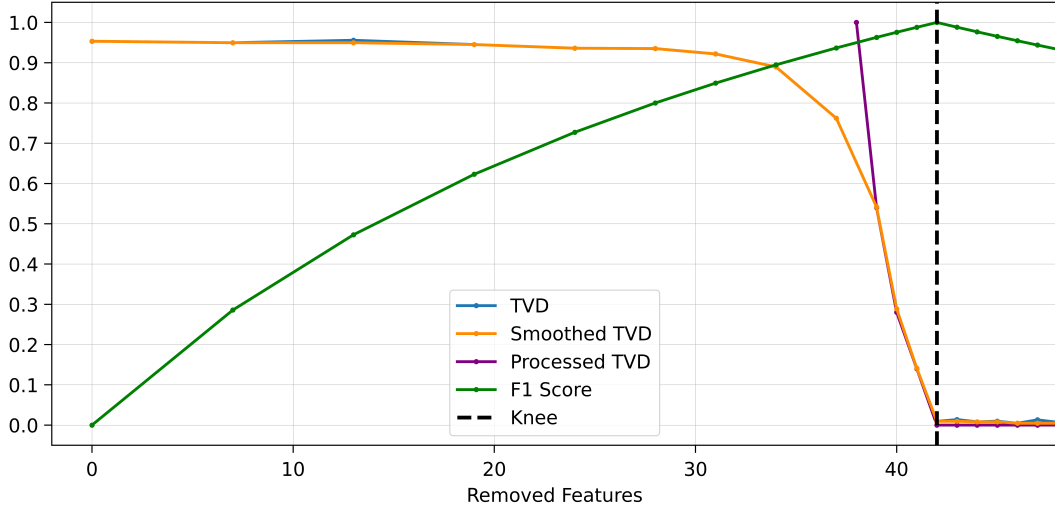

Figure 7: Knee location based on distribution shift: TVD vs. removed Features and F-1 score in location task.

## 709 E DF-Correct

710 DF-Correct (Section 5, Figure 2, and Algorithm 2) is the proposed method within DataFix that  
711 corrects the feature shifts by changing the values of the features in  $Y$  originating the distribution  
712 shift through an iterative approach. Given the set of corrupted features  $C$ , DF-Correct tries to  
713 generate a new query dataset  $Y'$ , such that  $Y_{\bar{C}} = Y'_{\bar{C}}$ , while  $D(X, Y') < D(X, Y)$ . DF-Correct  
714 starts by obtaining an initial candidate of  $Y'$  by setting the values within the subset  $C$  of  $Y$  as  
715 missing and performing imputation with linear regression and k-NN. Furthermore, a naive initial  
716 candidate is generated by replacing the corrupted values of  $Y$  with randomly selected values of  
717  $X$  (restricted to the features subset  $C$ ). Note that this naive initialization already fixes distribution  
718 shifts where features are completely independent of each other. The set of the 3 initial candidates,  
719  $V = \{Y^0, Y^1, Y^2\}$ , is evaluated by computing the empirical total variation divergence with a  
720 classifier, and the one providing the lowest empirical divergence is selected as the initial corrected

---

**Algorithm 2** DF-Correct: Feature Shift Correction
 

---

```

1: Inputs:
    $X$ ;                                ▷ Reference
    $Y$ ;                                ▷ Query
    $C$ ;                                ▷ Corrupted Features
    $\epsilon$ ;                                ▷ Divergence Threshold
2:  $V = \{Y^0, Y^1, Y^2\} \leftarrow \text{Impute}(X, Y, C)$ 
3:  $Y' \leftarrow \text{argmin}_{Y^i \in V} \hat{D}_\theta(X, Y^i)$ 
4: if  $\hat{D}_\theta(X, Y') < \epsilon$  then
5:   return  $Y'$ 
6: end if
7: for epoch do
8:    $\theta \leftarrow \text{Train}(X, Y')$                                 ▷ Train discriminators
9:    $I \leftarrow \text{DetectIncorrect}(\mathcal{D}_\theta(Y'))$                     ▷ Detect samples that require feature correction
10:   $B \leftarrow \text{GenerateProposals}(X, Y', V, C)$                 ▷ Obtain proposals from  $X, Y', V$ 
11:  for  $i \in I$  do
12:     $b_i \leftarrow \text{argmax}_{b \in B} r_{\theta_i}(y_i^{(b)})$                 ▷ Find best proposal
13:     $Y' \leftarrow \text{update}(Y', y_i^{(b_i)})$                     ▷ Update dataset with the corrected sample  $y_i^{(b_i)}$ 
14:  end for
15:  if  $\hat{D}_\theta(X, Y') < \epsilon$  then
16:    return  $Y'$ 
17:  end if
18: end for
19: return  $Y'$ 

```

---

721 query  $Y' = \text{argmin}_{Y^i \in V} \hat{D}_\theta(X, Y^i)$ . If  $\hat{D}_\theta(X, Y') < \epsilon$ , the correction process is done and  $Y'$  is  
 722 returned. Otherwise, if  $\hat{D}_\theta(X, Y') > \epsilon$ , an iterative process where some samples of  $Y'$  are modified  
 723 is performed.

724 The iterative process tries to find new values of  $Y' = \{y'_1, y'_2, \dots, y'_{N_y}\}$  that reduce the empirical total  
 725 variation distance:

$$\hat{D}_\theta^{TV}(X, Y') = \frac{1}{N_x} \sum_{i=1}^{N_x} g(r_\theta(x_i)) - \frac{1}{N_y} \sum_{j=1}^{N_y} g(r_\theta(y'_j)) \quad (13)$$

726 with  $g(u) = \frac{1}{2} \text{sign}(u - 1)$ . Because the values of  $X$  are left untouched, this becomes equivalent to  
 727 solving:

$$Y' = \text{argmin}_Y \max_{\theta} \sum_{j=1}^{N_y} -g(r_\theta(y'_j)) = \text{argmax}_Y \max_{\theta} \sum_{j=1}^{N_y} g(r_\theta(y'_j)) \quad (14)$$

728 In order to perform such an optimization process, a set of classifiers are trained using  $X, Y'$ , and  
 729 data augmentation consisting of performing random permutations within the features of the reference  
 730  $X$  dataset, in order to generate extra samples of "corrupted" sequences. After training the classifiers,  
 731 the next step is to find which samples need to be corrected. Note that when  $p = q$ , we have  
 732  $\mathbb{E}[\hat{D}_\theta^{TV}(X, Y)] = 0$ , and:

$$\mathbb{E}\left[\sum_{j \in N_y} g(r_\theta(y_j))\right] = \mathbb{E}\left[\sum_{m \in N^+} g(r_\theta(y_m))\right] - \mathbb{E}\left[\sum_{n \in N^-} g(r_\theta(y_n))\right] = 0 \quad (15)$$

733 where  $N^+ = \{i : r_\theta(y_i) > 1\}$  are the indices of samples classified as positive by the discriminator,  
 734 and  $N^- = \{i : r_\theta(y_i) < 1\}$  are the indices of samples classified as negative. Furthermore, both sets  
 735 have, in expectation, the same size  $\mathbb{E}[|N^+|] = \mathbb{E}[|N^-|] = \mathbb{E}\left[\frac{|N_y|}{2}\right]$ . This indicates that when both  
 736 distributions are equal, a discriminator will approximately classify half of the samples as positive and

half as negative. Therefore we only correct the set of samples  $I$ , including up to  $\frac{|N_y|}{2}$  samples with the highest probability of being corrupted:

$$I = \{i : r_{\theta_i}(y_i) < r_{\theta_{i+1}}(y_{i+1}) < 1\} \quad (16)$$

with  $|I| \leq \frac{|N_y|}{2}$ . Then, we construct a set of feature value proposals  $B$  that will replace the corrupted features. This proposal set is constructed by including within  $B$  all the feature values of the reference  $X$ , of the initial imputed candidates  $V$ , of the current corrected query  $Y'$ , and random permutations of  $X$ . Then, for every sample  $i \in I$ , each of the proposals  $b \in B$  is placed as an alternative to the corrupted features, generating a sample  $y_i^{(b)}$ , where  $y_i^{(b)}_C = b$ , and  $y_i^{(b)}_{\bar{C}} = y_{i\bar{C}}$ . The proposal providing the highest probability of being "non-corrupted" is selected:

$$b_i = \operatorname{argmax}_{b \in B} r_{\theta_i}(y_i^{(b)}) \quad (17)$$

Finally, the updated sample  $y_i^{(b)}$  is placed inside the corrected query  $Y'$ . After updating all samples in  $I$ , the divergence is computed again, and if  $\hat{D}_\theta(X, Y') > \epsilon$ , the process is repeated for a number of epochs. Typically, the number of epochs is set to 1 or 2, as the correction process can become computationally intensive for large datasets (see next sections).

## F Computational Time

Large and high-dimensional datasets are becoming the norm, therefore, methods that detect and correct feature shifts should be able to properly scale with respect to the number of samples and features.

Figure 8 presents the average computational time of feature shift location benchmarking methods as a function of the product between the number of samples and features for each dataset. MI and selectKbest stand out as the fastest benchmarks (using the Chi-square test for categorical datasets and ANOVA-F test for continuous datasets). MRMR and FAST-CMIM, although performing adequately in terms of speed for small datasets, encounter challenges in scaling with larger dataset sizes. Consequently, they fail to produce results within the 30-hour time limit for Founders and Canine datasets. Furthermore, the feature-shift detection techniques KNN-KS and, particularly MB-KS, demonstrate significantly slower performance, rendering them incapable of delivering results within the given time constraint for Founders, Canine, Dilbert, and Phenotypes datasets. DF-Locate proves to be a reasonably efficient method, exhibiting good scalability as the dataset size increases, while providing the best localization performance.

In Figure 9, we conduct a comparative analysis of the computational time for shift correction methods. Although DF-Correct is not faster than simpler techniques like median or linear regression, its speed surpasses several competing methods, such as MIRACLE and HyperImpute. Furthermore, DF-Correct exhibits reasonable runtime even for the largest high-dimensional Canine dataset, successfully correcting the distribution shift within the 30-hour time limit. Many of the competing methods were unable to provide results for the Canine dataset due to their excessive time complexity and/or memory requirements. Therefore, DF-Correct provides the best correction in terms of distribution shifts, while still providing competitive or faster speeds than competing methods.

## G Extended Feature Shift Localization Results

We evaluate the performance of DF-Locate across different fractions of manipulated features: 5%, 10%, and 25%. The F-1 scores, depicted in Figure 10, were computed by averaging across manipulation types and taking the median across real datasets for each feature shift localization method. Our findings show that DF-Locate obtains consistently higher performance, irrespective of the fraction of manipulated features involved. However, it is important to note that this is not the case for other methods, such as MRMR and FAST-CMIM, which exhibit limitations in their location capabilities, particularly when there are only a few corrupted features. Note that when a small percentage of manipulated features is present, a smaller amount of features need to be localized as corrupted. However,

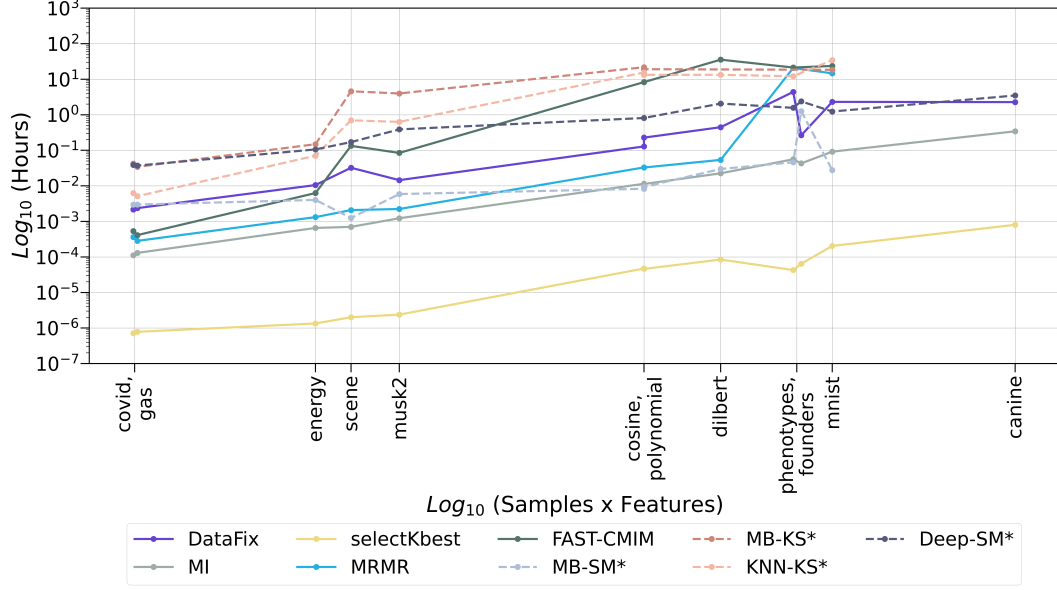

Figure 8: Computational time for shift location methods based on real dataset size.

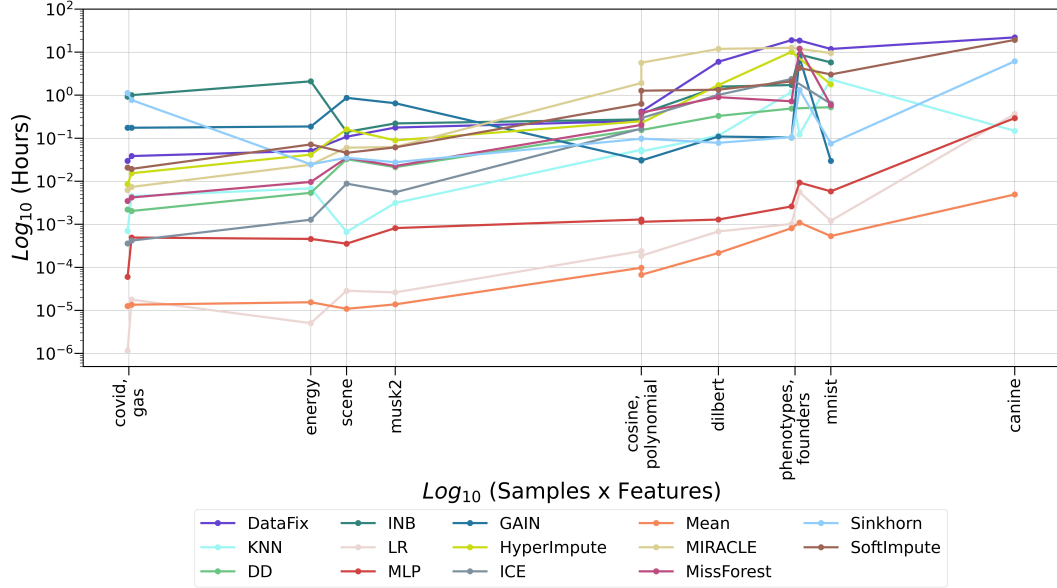

Figure 9: Computational time for shift correction methods based on real dataset size.

781 this could also lead, in some cases, to lower distribution shifts, making the detection of such shifts  
782 more challenging. On the other hand, the presence of a larger percentage of manipulated features  
783 can make the localization task more challenging, while the empirical detection of the presence of the  
784 shift can be, in some cases, easier.

785 Figure 11 shows the mean F-1 score of DF-Locate and various shift location methods applied to the  
786 real datasets. The symbol 'x' denotes experiments that are missing due to exceeding the time limit  
787 of 30 hours. Note that most methods fail to process high-dimensional datasets such as Founders  
788 and Canine, while DF-Locate is able to provide accurate results while scaling to large datasets.  
789 DF-Locate consistently exhibits superior performance compared to all benchmarking methods across  
790 most datasets. The only exception observed is with the Phenotypes dataset, where selectKBest  
791 slightly outperforms DF-Locate in locating the corrupted features. Nevertheless, for the remaining  
792 datasets, DF-Locate surpasses all competing approaches and is only slightly surpassed or equaled

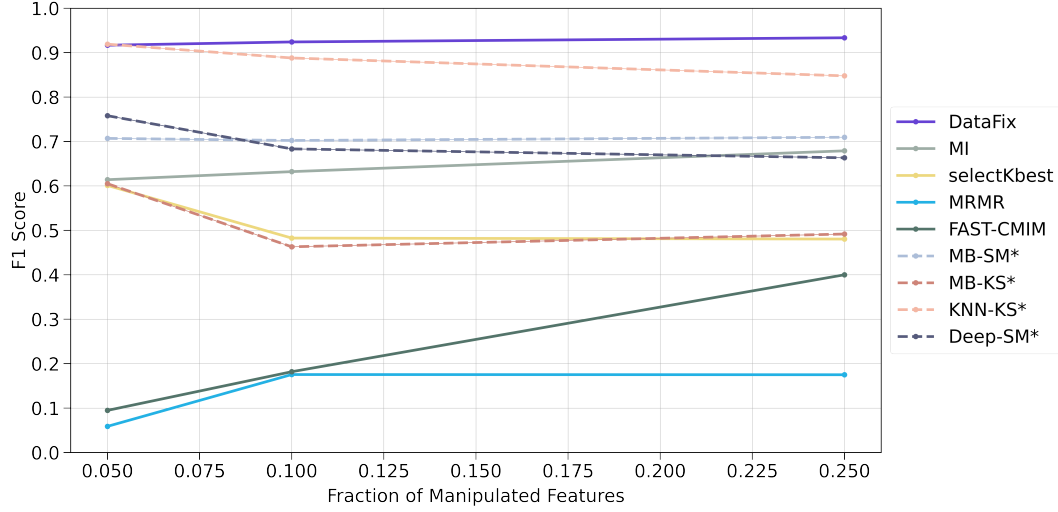

Figure 10: Median F-1 scores of shift location methods by fraction of manipulated features on real datasets.

in performance on a few occasions by Deep-SM (\*) or KNN-KS (\*), both of which use the ground truth  $|C|$ . Additionally, it is worth noting that MI always outperforms selectKbest on datasets with continuous features, while the opposite holds true for datasets with categorical features.

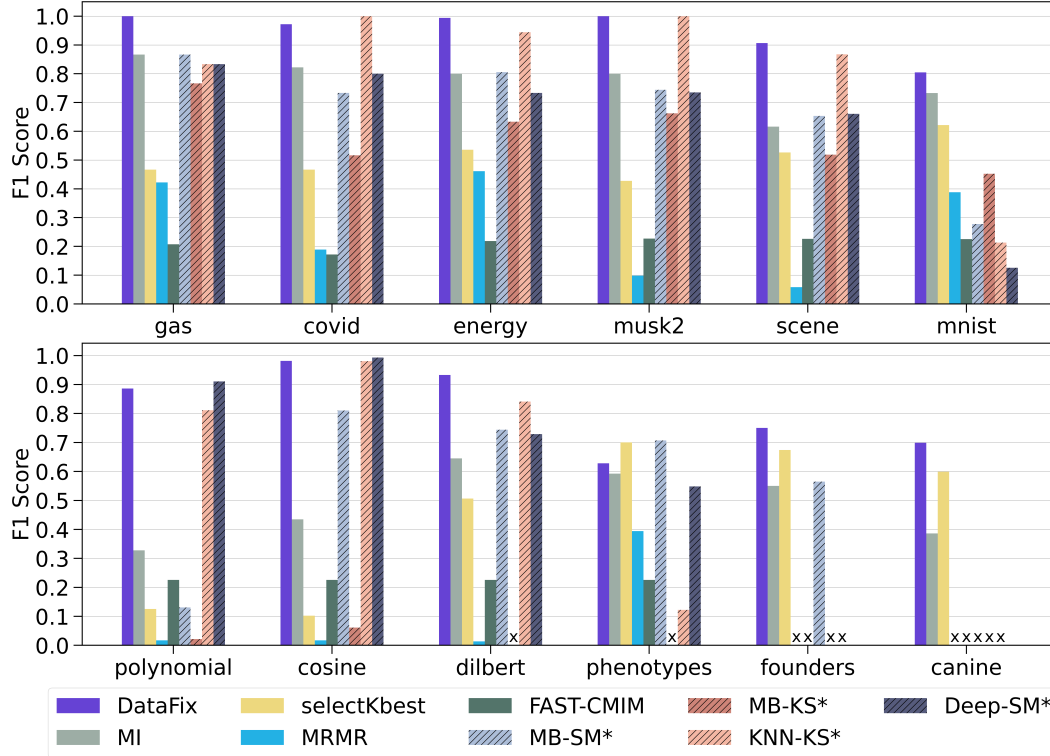

Figure 11: Mean F-1 scores of shift location methods by real datasets. 'x' indicates missing experiment. Higher is better.

Figure 12 shows the median F-1 scores of DF-Locate and other competing methods, categorized by the feature manipulation type applied to the real datasets. The average F-1 score is computed

798 across fractions of manipulated features, followed by the computation of the median F-1 score  
799 across different datasets. The symbol 'x' is used to indicate missing experiments for MB-KS and  
800 manipulation types 6.1-6.3 and 10. These manipulations are applied to categorical datasets only  
801 (Phenotypes, Founders, Canine), and the MB-KS method did not yield results for any of these three  
802 datasets within the specified time constraint of 30 hours. Manipulations involving shifts caused  
803 by the correlation between features (manipulations 3 and 8) are not detected by methods such as  
804 MI, selectKbest, MRMR and Fast-CMIM, while being accurately detected by MB-SM, KNN-KS,  
805 Deep-SM, and our proposed method. Note that while manipulation type 8 breaks the theoretical  
806 equivalence between feature selection and feature shift localization problem (see previous sections),  
807 it is still accurately localized by DataFix. Manipulation 10, consisting of replacing feature values  
808 with the ones predicted with a k-NN, is the most challenging to detect by DataFix. Note that such  
809 manipulation can lead, in some scenarios, to small or undetectable distribution shifts, as k-NN  
810 provides perfect predictions when its training dataset size goes to infinity.

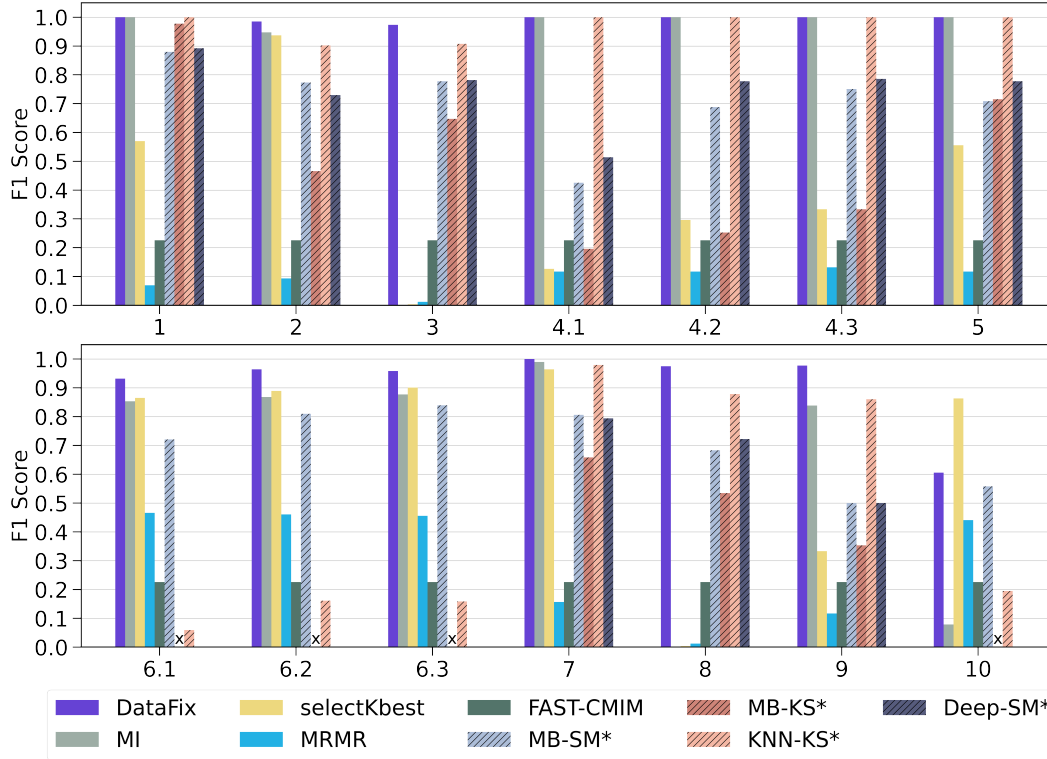

Figure 12: Median F-1 scores of shift location methods by feature manipulation type on real datasets. 'x' indicates missing experiment. Higher is better.

811 Figure 13 displays the mean F-1 scores of shift location methods by simulated datasets. Similar to the  
812 real datasets, DF-Locate outperforms or matches all competing methods, except in datasets 7 and 8,  
813 where MB-SM and Deep-SM obtain a higher F-1 localization score when using  $|C|$  as extra ground  
814 truth information. Note that in a fair comparison where  $|C|$  is not used, MB-SM and Deep-SM  
815 perform poorly (see Figure 3). DF-Locate obtains lower F-1 scores in simulated datasets 5, 7, and  
816 8, with respect to the other datasets, which involve shifts originated by a mismatching correlation  
817 between distributions.

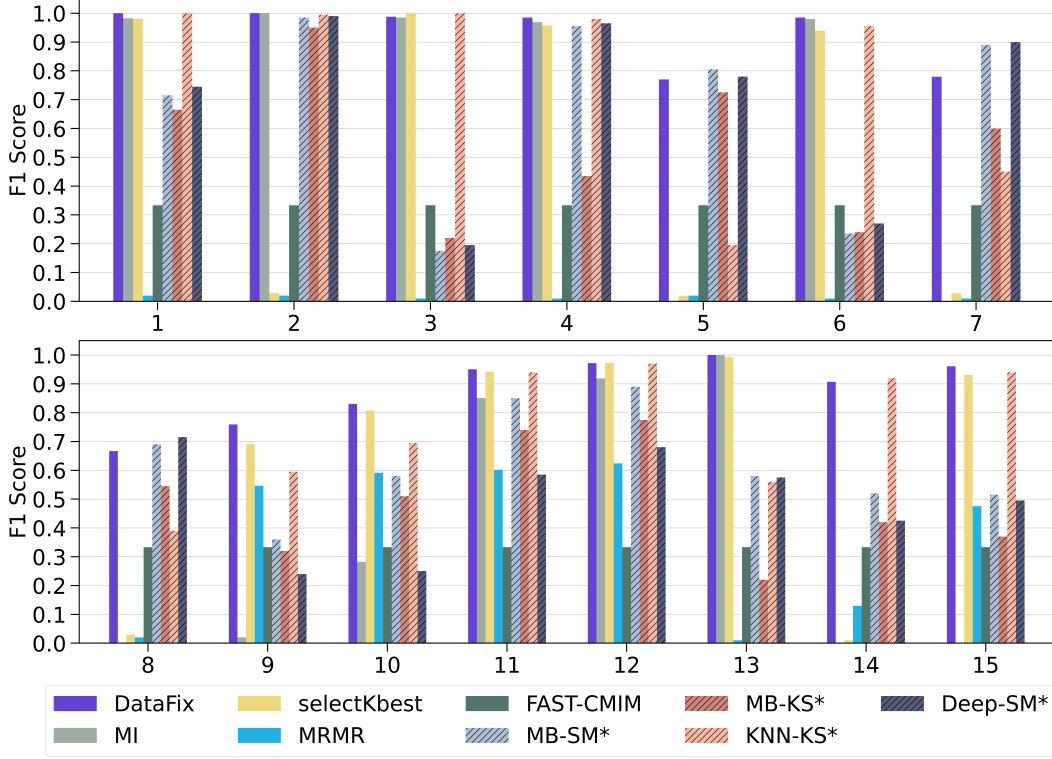

Figure 13: Mean F-1 scores of shift location methods by simulated datasets. Higher is better.

## 818 H Extended Feature Shift Correction Results

819 Figures 14 and 15 provide a comprehensive evaluation of the performance of DF-Correct and  
820 competing shift correction methods across real datasets, by using the evaluation metrics  $W_2^2$ ,  $D_{hp}$ ,  
821 and  $D_{skl}$ . The reported metrics provide empirical estimates of the divergences between the corrected  
822 query datasets and the reference datasets. Note that first, the empirical divergences between the  
823 reference and query dataset (prior to any manipulation) are computed, and subtracted from the reported  
824 metrics. In terms of empirical divergences, DataFix outperforms all other methods by a significant  
825 margin for most datasets, demonstrating its high effectiveness in providing corrected query datasets  
826 that are close to the reference distribution. Following DataFix, simpler methods like k-NN and linear  
827 regression demonstrate competitive performance for most datasets, while benchmarks such as ICE,  
828 HyperImpute, INB, Sinkhorn, and MLPs yield favorable results for specific datasets. Furthermore,  
829 DataFix consistently achieves the lowest  $W_2^2$  values across most datasets, with exceptions being  
830 MNIST and Phenotypes. Specifically, for the MNIST dataset, k-NN, MLP, HyperImpute, and ICE  
831 surpass DataFix achieving the best  $W_2^2$  value of 0. Note that for high-dimensional datasets such  
832 as Dilbert, Phenotypes, Founders, and Canine, the  $W_2^2$  metric saturates to 0 for multiple methods,  
833 making the other metrics a better alternative to compare the quality between methods. DataFix  
834 is outperformed by MIRACLE in terms of  $D_{hp}$  and  $D_{skl}$  in the Dilbert and Phenotypes dataset,  
835 however, it is important to note that Miracle’s slow execution time prevents it from providing results  
836 for the Founders and Canine datasets.



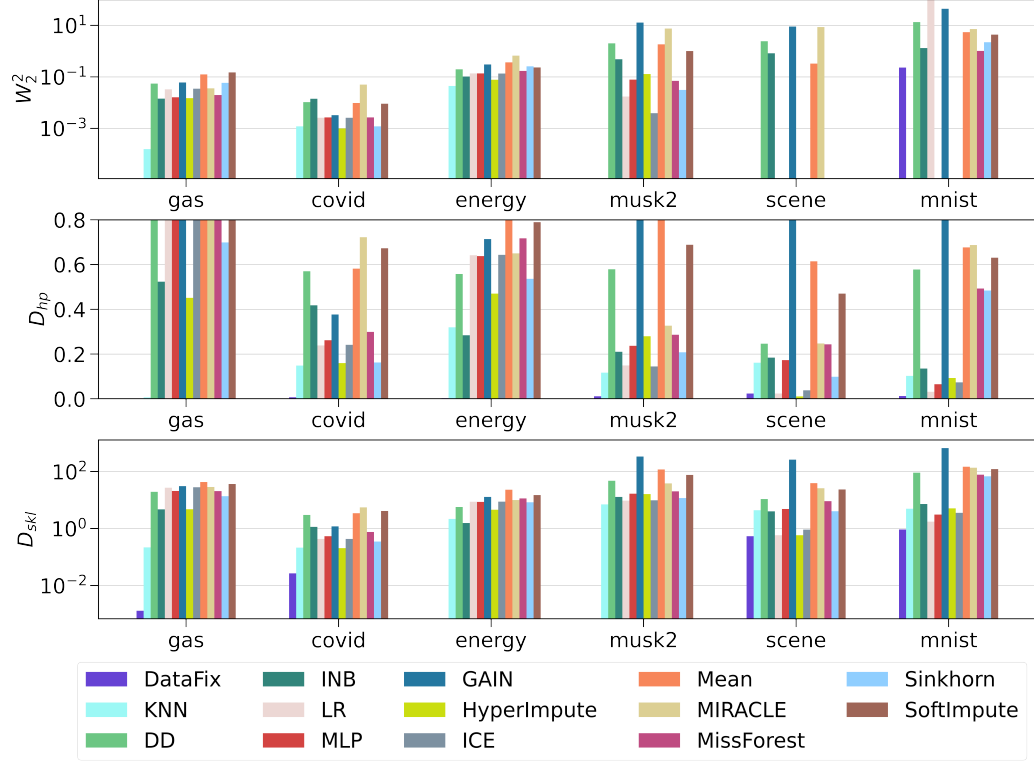

Figure 14:  $W_2^2$ ,  $D_{hp}$ , and  $D_{skl}$  of shift correction methods by real datasets. Lower is better. (Part 1)

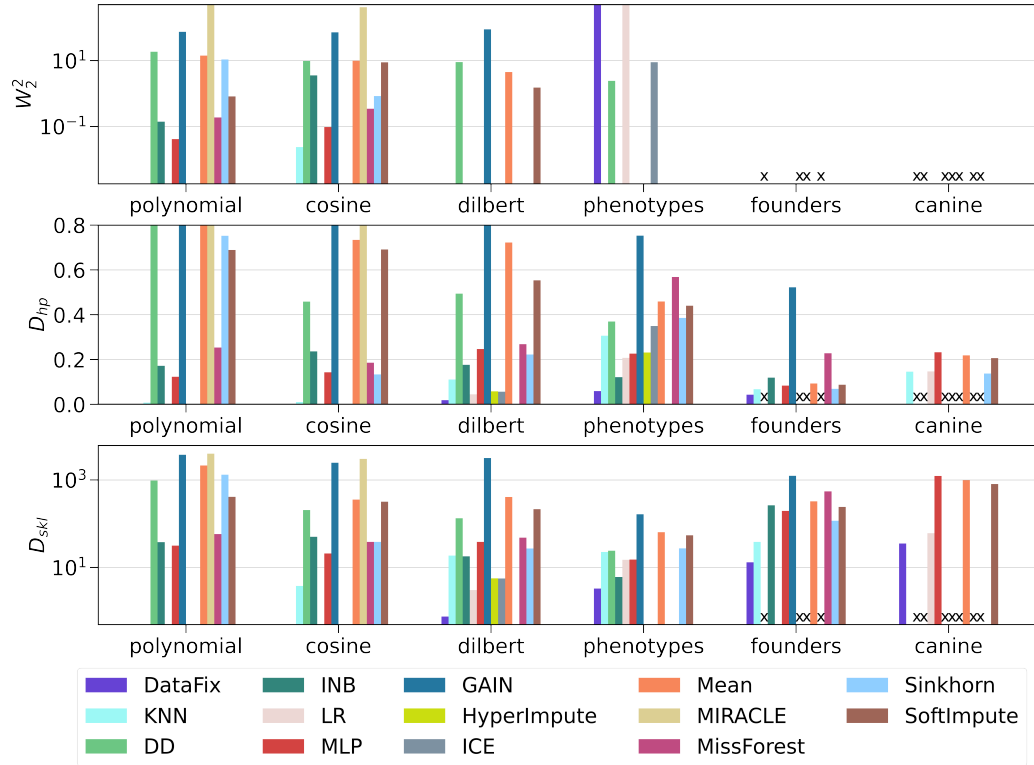

Figure 15:  $W_2^2$ ,  $D_{hp}$ , and  $D_{skl}$  of shift correction methods by real datasets. Lower is better. (Part 2)

## 837 I Classifier Analysis for Localization and Correction

838 Figure 16 provides the F-1 score results for DF-Locate when using different classifiers as discrimi-  
 839 nators within the iterative process applied to the simulated datasets. Tree-based methods including  
 840 Random Forest (RF), CatBoost, ExtraTree, and LightGBM (LGBM) provide highly similar results,  
 841 with high F-1 scores, surpassing linear models such as logistic regression (LogReg) and a support  
 842 vector classifier (SVC). We selected RF as our discriminator as it provided much faster training times  
 843 while being highly competitive in localization accuracy.

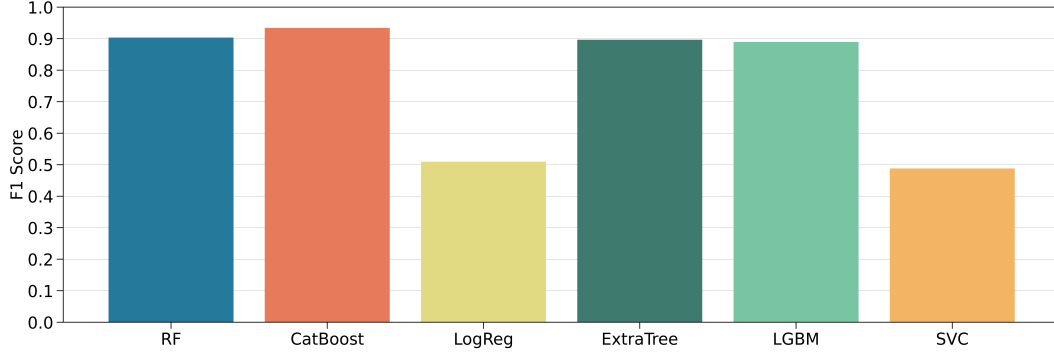

Figure 16: Mean F-1 scores by DF-Locate using different classifiers on simulated datasets. Higher is better.

844 Figure 17 provides the feature shift correction metrics for DF-Correct when using different classifiers  
 845 as discriminators within the iterative process within the real and simulated datasets. Similar to DF-  
 846 Locate, Tree-based methods provide similar results, surpassing the linear methods in most metrics.  
 847 We use  $D_{hp}$  as a metric to select our method because it provides an estimate that tightly bounds the  
 848 total variation distance. Namely, we select CatBoost as our discriminator as it provides competitive  
 849 performance with the other tree-based methods in the simulated datasets, and clearly outperforms the  
 850 others in the real datasets.

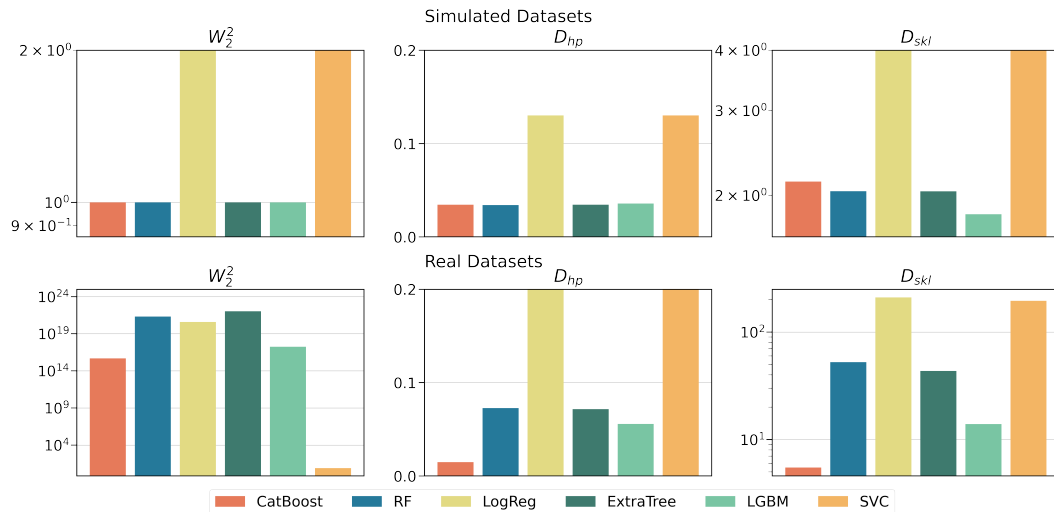

Figure 17: Mean  $W_2^2$ ,  $D_{hp}$ , and  $D_{skl}$  by DF-Correct using different classifiers on simulated (top) and real (bottom) datasets. Lower is better.

## 851 J DataFix Analysis

852 Figures 18 and 19 provide two additional examples that illustrate the iterative process of DF-Locate  
 853 before and after shift correction in simulated datasets 1 and 2, respectively. In each dataset, there are  
 854 200 corrupted features out of 1000. Similar to Figure 5, Figures 18 and 19 (left) display the TVD  
 855 estimated by the random forest (blue), which provides a lower bound for its ground truth Monte Carlo  
 856 estimate (black), as the iterative process detects and removes corrupted features. The F-1 detection  
 857 score progressively increases until all corrupted features are identified, leading to the termination of  
 858 the iterative process. Figures 18 and 19 (right) showcase the iterative process applied to the corrected  
 859 query using different methods.

860 In simulated dataset 1 (Figure 18 ), both MIRACLE and MLP yield an updated query that results in a  
 861 lower empirical divergence. However, for simulated dataset 2 (Figure 19), only MLP produces an  
 862 updated query that leads to a lower empirical divergence. The other shift correction benchmarking  
 863 methods generate an updated query that increases the shift instead of reducing it. Notably, DF-Correct  
 864 (Purple) provides a precisely corrected query with no empirical divergence detected by DF-Locate.

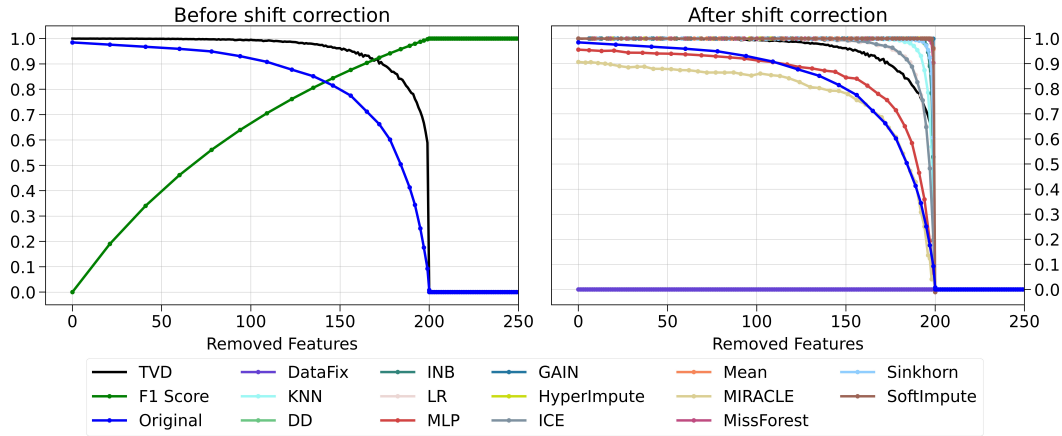

Figure 18: DF-Locate iterative process before and after shift correction.

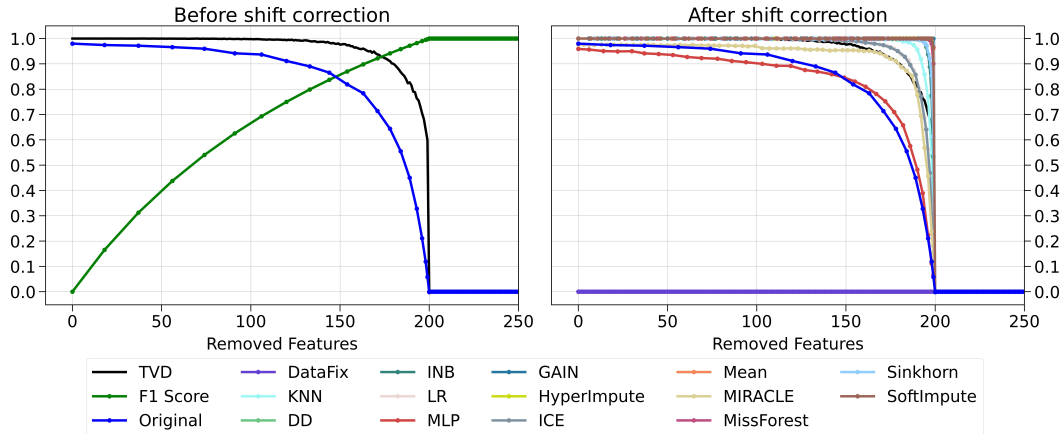

Figure 19: DF-Locate iterative process before and after shift correction.
